# Supplementary material for: Chromosome Segregation and Cell Division Defects in Escherichia coli Recombination Mutants Exposed to Different DNA-Damaging Treatments
Source: MDPI journal article supplement (doi:10.3390/microorganisms11030701), 2023-03-09
Supplement: s1 [file s1]

**Table S1.** *E. coli* strains used in this work.

| Strain                                                     | Relevant genotype                                   | Source or reference                                                         |
|------------------------------------------------------------|-----------------------------------------------------|-----------------------------------------------------------------------------|
| <b>Used for strain construction</b>                        |                                                     |                                                                             |
| CAG18486                                                   | <i>eda-51::Tn10</i>                                 | CGSC <sup>a</sup>                                                           |
| JW2549-1                                                   | <i>ΔrecO737::kan</i>                                | CGSC <sup>a</sup>                                                           |
| LMM1672                                                    | <i>recB268::Tn10</i>                                | Buljubašić et al., 2013                                                     |
| LMM1673                                                    | <i>ΔruvABC::cam</i>                                 | Buljubašić et al., 2013                                                     |
| LMM4194                                                    | <i>eda-51::Tn10 ΔruvABC::cam</i>                    | P1.LMM1673 × CAG18486<br>to Cm <sup>r</sup> Tc <sup>r</sup> UV <sup>s</sup> |
| N6052                                                      | <i>ΔrecG1919::apra</i>                              | R.G. Lloyd                                                                  |
| N6197                                                      | <i>ΔrecB1910::dhfr</i>                              | R.G. Lloyd                                                                  |
| <b>MG1655 derivatives<sup>b</sup> used for experiments</b> |                                                     |                                                                             |
| LMM2629 <sup>c</sup>                                       | <i>rec<sup>+</sup> ruv<sup>+</sup></i>              | Buljubašić et al., 2013                                                     |
| LMM3183                                                    | <i>recB268::Tn10</i>                                | P1. LMM1672 × LMM2629<br>to Tc <sup>r</sup> UV <sup>s</sup>                 |
| LMM3188                                                    | <i>ΔruvABC::cam</i>                                 | P1. LMM1673 × LMM2629<br>to Cm <sup>r</sup> UV <sup>s</sup>                 |
| LMM3196                                                    | <i>ΔrecG1919::apra</i>                              | P1.N6052 × LMM2629 to<br>Apra <sup>r</sup> UV <sup>s</sup>                  |
| LMM3545                                                    | <i>ΔrecO737::kan</i>                                | P1. JW2549-1 × LMM2629<br>to Km <sup>r</sup> UV <sup>s</sup>                |
| LMM3599                                                    | <i>ΔrecO737::kan recB268::Tn10</i>                  | P1.LMM1672 × LMM3545<br>to Tc <sup>r</sup> UV <sup>s</sup>                  |
| LMM3600                                                    | <i>ΔrecO737::kan ΔruvABC::cam</i>                   | P1.LMM1673 × LMM3545<br>to Cm <sup>r</sup> UV <sup>s</sup>                  |
| LMM3601                                                    | <i>ΔrecO737::kan ΔrecG1919::apra</i>                | P1.N6052 × LMM3545 to<br>Apra <sup>r</sup> UV <sup>s</sup>                  |
| LMM3602                                                    | <i>ΔrecO737::kan ΔruvABC::cam<br/>recB268::Tn10</i> | P1.LMM1672 × LMM3600<br>to Tc <sup>r</sup> UV <sup>s</sup>                  |
| LMM3603                                                    | <i>ΔrecO737::kan ΔrecG1919::apra</i>                | P1.LMM1672 × LMM3601                                                        |

| Strain  | Relevant genotype                                                                                   | Source or reference                                        |
|---------|-----------------------------------------------------------------------------------------------------|------------------------------------------------------------|
|         | <i>recB268::Tn10</i>                                                                                | to Tc <sup>r</sup> UV <sup>s</sup>                         |
| LMM3604 | <i>ΔrecO737::kan ΔrecG1919::apra</i><br><i>ΔruvABC::cam</i>                                         | P1.LMM1673 × LMM3601<br>to Cm <sup>r</sup> UV <sup>s</sup> |
| LMM3605 | <i>ΔrecO737::kan ΔrecG1919::apra</i><br><i>ΔruvABC::cam recB268::Tn10</i>                           | P1.LMM1672 × LMM3604<br>to Tc <sup>r</sup>                 |
| LMM3610 | <i>ΔruvABC::cam ΔrecG1919::apra</i>                                                                 | P1.N6052 × LMM3188 to<br>Apra <sup>r</sup> UV <sup>s</sup> |
| LMM3625 | <i>ΔruvABC::cam recB268::Tn10</i>                                                                   | P1.LMM1672 × LMM3188<br>to Tc <sup>r</sup>                 |
| LMM3626 | <i>ΔrecG1919::apra recB268::Tn10</i>                                                                | P1.LMM1672 × LMM3196<br>to Tc <sup>r</sup> UV <sup>s</sup> |
| LMM4134 | <i>ΔruvABC::cam ΔrecG1919::apra</i><br><i>recB268::Tn10</i>                                         | P1.LMM1672 × LMM3610<br>to Tc <sup>r</sup>                 |
| TRM387  | <i>ΔargE::I-SceI<sub>CS</sub>-cat ΔattB::P<sub>BAD</sub> I-SceI</i>                                 | Meddows et al., 2004                                       |
| LMM4198 | as TRM387 plus <i>ΔrecB1910::dhfr</i>                                                               | P1.N6197 × TRM387 to Tm <sup>r</sup><br>UV <sup>s</sup>    |
| LMM4199 | as TRM387 plus <i>eda-51::Tn10</i><br><i>ΔruvABC::cam</i>                                           | P1.LMM4194 × TRM387<br>to Tc <sup>r</sup> UV <sup>s</sup>  |
| LMM4201 | as TRM387 plus <i>ΔrecG1919::apra</i>                                                               | P1.N6052 × TRM387 to<br>Apra <sup>r</sup> UV <sup>s</sup>  |
| LMM4202 | as TRM387 plus <i>eda-51::Tn10</i><br><i>ΔruvABC::cam ΔrecG1919::apra</i>                           | P1.N6052 × LMM4199 to<br>Apra <sup>r</sup> UV <sup>s</sup> |
| LMM4611 | as TRM387 plus <i>eda-51::Tn10</i><br><i>ΔruvABC::cam ΔrecB1910::dhfr</i>                           | P1.N6197 × LMM4199 to<br>Tm <sup>r</sup>                   |
| LMM4612 | as TRM387 plus <i>ΔrecG1919::apra</i><br><i>ΔrecB1910::dhfr</i>                                     | P1.N6197 × LMM4201 to<br>Tm <sup>r</sup> UV <sup>s</sup>   |
| LMM4613 | as TRM387 plus <i>eda-51::Tn10</i><br><i>ΔruvABC::cam ΔrecG1919::apra</i><br><i>ΔrecB1910::dhfr</i> | P1.N6197 × LMM4202 to<br>Tm <sup>r</sup>                   |

| Strain  | Relevant genotype                                                                                                             | Source or reference                                             |
|---------|-------------------------------------------------------------------------------------------------------------------------------|-----------------------------------------------------------------|
| LMM4617 | as TRM387 plus $\Delta recO737::kan$                                                                                          | P1. JW2549-1 $\times$ TRM387 to Km <sup>r</sup> UV <sup>s</sup> |
| LMM4618 | as TRM387 plus $\Delta recO737::kan$ <i>eda-51::Tn10</i> $\Delta ruvABC::cam$                                                 | P1.LMM4194 $\times$ LMM4617 to Tc <sup>r</sup> UV <sup>s</sup>  |
| LMM4619 | as TRM387 plus $\Delta recO737::kan$ $\Delta recG1919::apra$                                                                  | P1.N6052 $\times$ LMM4617 to Apra <sup>r</sup> UV <sup>s</sup>  |
| LMM4620 | as TRM387 plus $\Delta recO737::kan$ <i>eda-51::Tn10</i> $\Delta ruvABC::cam$ $\Delta recG1919::apra$                         | P1.N6052 $\times$ LMM4618 to Apra <sup>r</sup> UV <sup>s</sup>  |
| LMM4621 | as TRM387 plus $\Delta recO737::kan$ $\Delta recB1910::dhfr$                                                                  | P1.N6197 $\times$ LMM4617 to Tm <sup>r</sup> UV <sup>s</sup>    |
| LMM4658 | as TRM387 plus $\Delta recO737::kan$ <i>eda-51::Tn10</i> $\Delta ruvABC::cam$ $\Delta recB1910::dhfr$                         | P1.N6197 $\times$ LMM4618 to Tm <sup>r</sup> UV <sup>s</sup>    |
| LMM4659 | as TRM387 plus $\Delta recO737::kan$ $\Delta recG1919::apra$ $\Delta recB1910::dhfr$                                          | P1.N6197 $\times$ LMM4619 to Tm <sup>r</sup> UV <sup>s</sup>    |
| LMM4660 | as TRM387 plus $\Delta recO737::kan$ <i>eda-51::Tn10</i> $\Delta ruvABC::cam$ $\Delta recG1919::apra$ $\Delta recB1910::dhfr$ | P1.N6197 $\times$ LMM4620 to Tm <sup>r</sup>                    |

<sup>a</sup> Strain obtained from the *Escherichia coli* Genetic Stock Center, Yale.

<sup>b</sup> MG1655 markers are F<sup>-</sup>  $\lambda$  *ilvG rfb-50 rph-1*.

<sup>c</sup> As MG1655 but  $\Delta proA::frr$ .

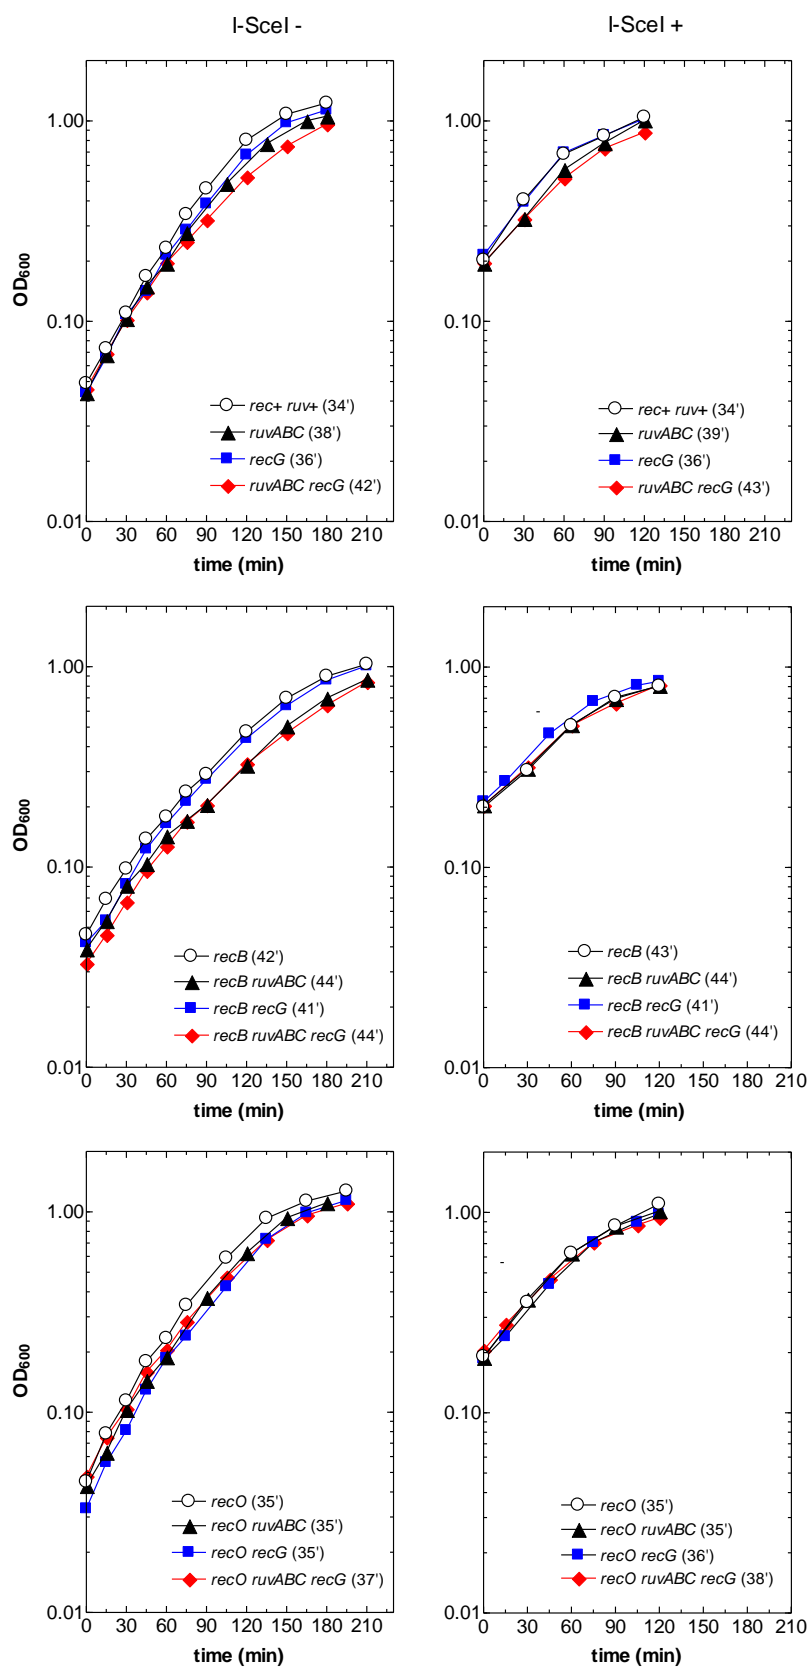

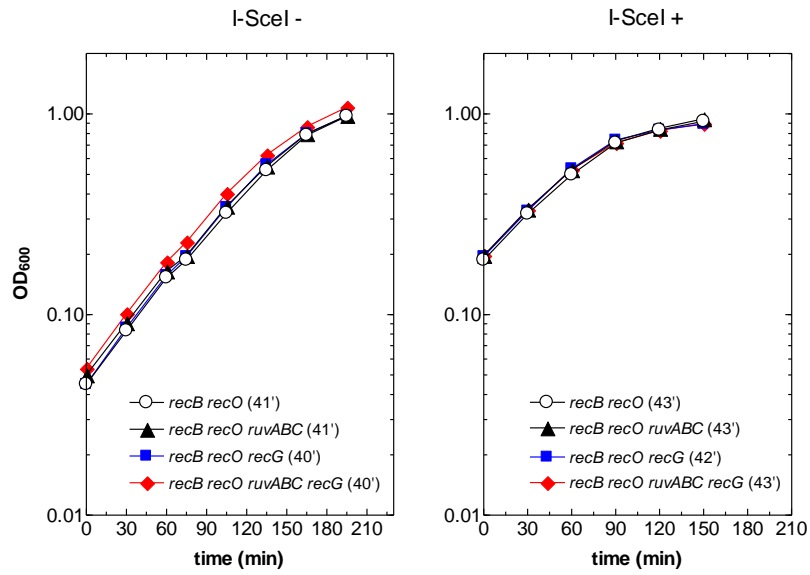

**Figure S1.** Growth of different TRM387 derivatives. Left side of the panel: normal growth in LB medium (without I-SceI expression). Right side of the panel: growth in LB medium with arabinose (induced I-SceI expression). To compare growth rates of I-SceI-induced and -noninduced cells, mass doubling times (in minutes) were calculated from the same range of growth curves (OD<sub>600</sub> of 0.2 - 0.6) and are given in parentheses. Details on growth conditions are given in Materials and Methods.

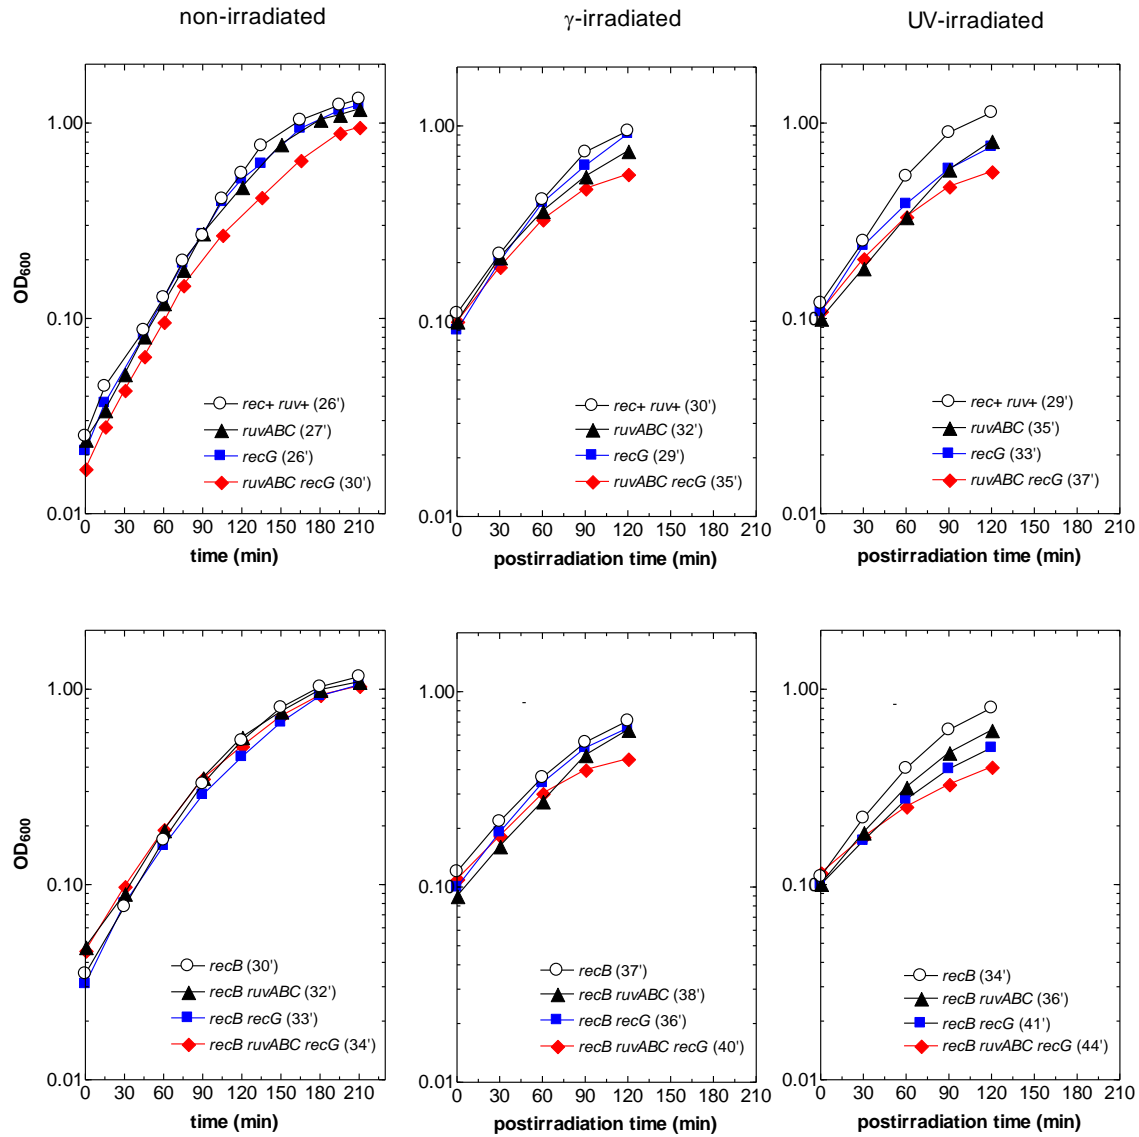

**Figure S2.** Effects of  $\gamma$ -irradiation (100 Gy) and UV-irradiation ( $5 \text{ J/m}^2$ ) on growth rates of different recombination mutants of *E. coli*. Mass doubling times (in minutes) were calculated from exponential parts of growth curves ( $\text{OD}_{600}$  of 0.1 – 0.3) and are given in parentheses. Irradiated cell cultures were adjusted to  $\text{OD}_{600}$  of  $\sim 0.1$  and their growth was then followed for next 120 min. Details on  $\gamma$ - and UV-irradiation are given in Materials and Methods.

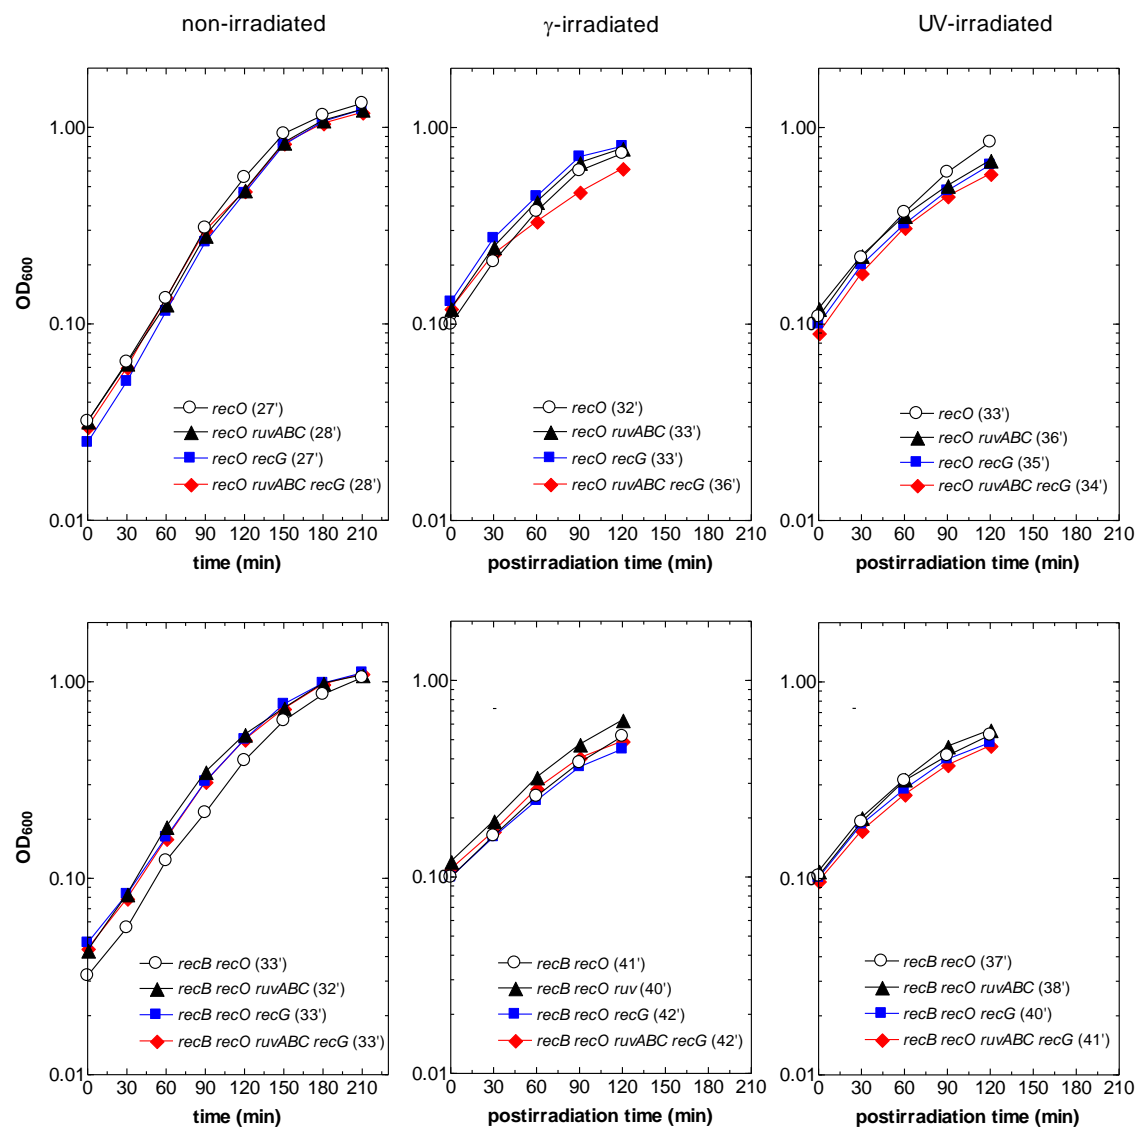

Figure S2. Continued

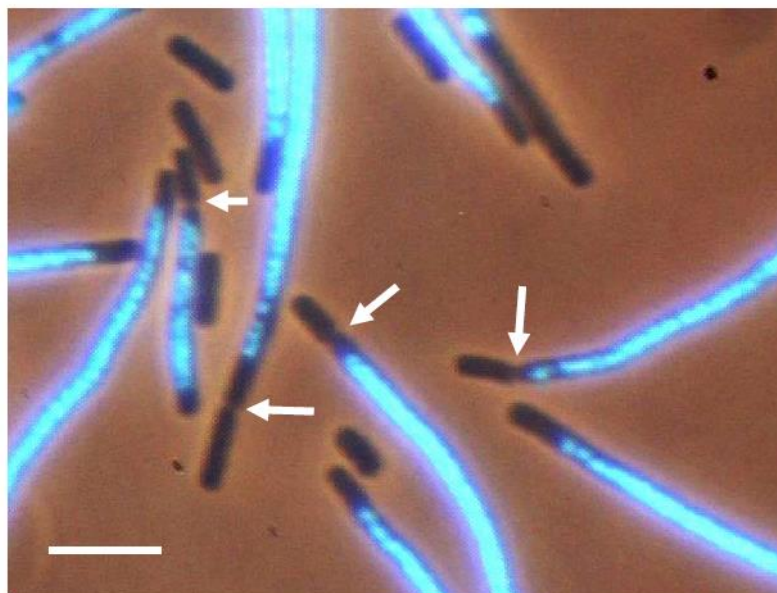

**Figure S3.** Formation of anucleate cells in *ruvABC* mutants after introduction of double-strand DNA breaks by I-SceI endonuclease. Arrows indicate septation events (cell constrictions) leading to segregation of anucleate cells. Bar, 5 $\mu$ m.



**Table S2.** *E. coli* strains divided into groups (Tukey HSD test,  $\alpha=0.05$ ) based on the data on survival at 60 min after I-SceI expression (Table 1). Groups labeled with identical letters don't differ significantly in mean log survival rates. The group labels are ordered by the decreasing survival rates.

| Strain/genotype            | Group |
|----------------------------|-------|
| 4618_recO_ruvABC           | a     |
| TRM387_wt                  | a     |
| 4617_recO                  | a     |
| 4199_ruvABC                | a     |
| 4619_recO_recG             | ab    |
| 4201_recG                  | b     |
| 4612_recB_recG             | c     |
| 4611_recB_ruvABC           | c     |
| 4198_recB                  | c     |
| 4660_recB_recO_ruvABC_recG | cd    |
| 4613_recB_ruvABC_recG      | cd    |
| 4621_recB_recO             | cd    |
| 4658_recB_recO_ruvABC      | cde   |
| 4659_recB_recO_recG        | cde   |
| 4620_recO_ruvABC_recG      | de    |
| 4202_ruvABC_recG           | e     |

**Table S3.** Statistical analysis of differences in survival at 60 min after I-SceI expression (Table 1) presented as pairwise p-values (p adj) from the Tukey HSD test, which controls for multiple testing.

| Comparison strain1-strain2           | p adj    |
|--------------------------------------|----------|
| 4199_ruvABC-4198_recB                | 8.13E-09 |
| 4201_recG-4198_recB                  | 0.000378 |
| 4202_ruvABC_recG-4198_recB           | 0.001844 |
| 4611_recB_ruvABC-4198_recB           | 1        |
| 4612_recB_recG-4198_recB             | 1        |
| 4613_recB_ruvABC_recG-4198_recB      | 0.999999 |
| 4617_recO-4198_recB                  | 3.32E-09 |
| 4618_recO_ruvABC-4198_recB           | 1.00E-09 |
| 4619_recO_recG-4198_recB             | 1.18E-06 |
| 4620_recO_ruvABC_recG-4198_recB      | 0.049389 |
| 4621_recB_recO-4198_recB             | 0.999528 |
| 4658_recB_recO_ruvABC-4198_recB      | 0.948694 |
| 4659_recB_recO_recG-4198_recB        | 0.344266 |
| 4660_recB_recO_ruvABC_recG-4198_recB | 1        |
| TRM387_wt-4198_recB                  | 2.76E-09 |
| 4201_recG-4199_ruvABC                | 0.026087 |

|                                             |          |
|---------------------------------------------|----------|
| 4202_ruvABC_recG-4199_ruvABC                | 2.53E-13 |
| 4611_recB_ruvABC-4199_ruvABC                | 1.45E-08 |
| 4612_recB_recG-4199_ruvABC                  | 2.32E-08 |
| 4613_recB_ruvABC_recG-4199_ruvABC           | 1.81E-09 |
| 4617_recO-4199_ruvABC                       | 1        |
| 4618_recO_ruvABC-4199_ruvABC                | 0.999931 |
| 4619_recO_recG-4199_ruvABC                  | 0.854895 |
| 4620_recO_ruvABC_recG-4199_ruvABC           | 1.92E-12 |
| 4621_recB_recO-4199_ruvABC                  | 7.00E-10 |
| 4658_recB_recO_ruvABC-4199_ruvABC           | 1.62E-10 |
| 4659_recB_recO_recG-4199_ruvABC             | 1.37E-11 |
| 4660_recB_recO_ruvABC_recG-4199_ruvABC      | 2.52E-09 |
| TRM387_wt-4199_ruvABC                       | 1        |
| 4202_ruvABC_recG-4201_recG                  | 7.09E-10 |
| 4611_recB_ruvABC-4201_recG                  | 0.000719 |
| 4612_recB_recG-4201_recG                    | 0.00121  |
| 4613_recB_ruvABC_recG-4201_recG             | 6.77E-05 |
| 4617_recO-4201_recG                         | 0.010346 |
| 4618_recO_ruvABC-4201_recG                  | 0.002746 |
| 4619_recO_recG-4201_recG                    | 0.768763 |
| 4620_recO_ruvABC_recG-4201_recG             | 1.58E-08 |
| 4621_recB_recO-4201_recG                    | 2.22E-05 |
| 4658_recB_recO_ruvABC-4201_recG             | 3.87E-06 |
| 4659_recB_recO_recG-4201_recG               | 1.90E-07 |
| 4660_recB_recO_ruvABC_recG-4201_recG        | 9.94E-05 |
| TRM387_wt-4201_recG                         | 0.008489 |
| 4611_recB_ruvABC-4202_ruvABC_recG           | 0.000976 |
| 4612_recB_recG-4202_ruvABC_recG             | 0.00058  |
| 4613_recB_ruvABC_recG-4202_ruvABC_recG      | 0.009574 |
| 4617_recO-4202_ruvABC_recG                  | 1.78E-13 |
| 4618_recO_ruvABC-4202_ruvABC_recG           | 1.30E-13 |
| 4619_recO_recG-4202_ruvABC_recG             | 6.91E-12 |
| 4620_recO_ruvABC_recG-4202_ruvABC_recG      | 0.994556 |
| 4621_recB_recO-4202_ruvABC_recG             | 0.026411 |
| 4658_recB_recO_ruvABC-4202_ruvABC_recG      | 0.113095 |
| 4659_recB_recO_recG-4202_ruvABC_recG        | 0.672061 |
| 4660_recB_recO_ruvABC_recG-4202_ruvABC_recG | 0.00668  |
| TRM387_wt-4202_ruvABC_recG                  | 1.68E-13 |
| 4612_recB_recG-4611_recB_ruvABC             | 1        |
| 4613_recB_ruvABC_recG-4611_recB_ruvABC      | 0.999946 |
| 4617_recO-4611_recB_ruvABC                  | 5.84E-09 |
| 4618_recO_ruvABC-4611_recB_ruvABC           | 1.74E-09 |
| 4619_recO_recG-4611_recB_ruvABC             | 2.20E-06 |

|                                                  |          |
|--------------------------------------------------|----------|
| 4620_recO_ruvABC_recG-4611_recB_ruvABC           | 0.028363 |
| 4621_recB_recO-4611_recB_ruvABC                  | 0.995672 |
| 4658_recB_recO_ruvABC-4611_recB_ruvABC           | 0.872452 |
| 4659_recB_recO_recG-4611_recB_ruvABC             | 0.232374 |
| 4660_recB_recO_ruvABC_recG-4611_recB_ruvABC      | 0.999994 |
| TRM387_wt-4611_recB_ruvABC                       | 4.85E-09 |
| 4613_recB_ruvABC_recG-4612_recB_recG             | 0.999412 |
| 4617_recO-4612_recB_recG                         | 9.31E-09 |
| 4618_recO_ruvABC-4612_recB_recG                  | 2.74E-09 |
| 4619_recO_recG-4612_recB_recG                    | 3.68E-06 |
| 4620_recO_ruvABC_recG-4612_recB_recG             | 0.017755 |
| 4621_recB_recO-4612_recB_recG                    | 0.983568 |
| 4658_recB_recO_ruvABC-4612_recB_recG             | 0.779282 |
| 4659_recB_recO_recG-4612_recB_recG               | 0.16267  |
| 4660_recB_recO_ruvABC_recG-4612_recB_recG        | 0.999889 |
| TRM387_wt-4612_recB_recG                         | 7.71E-09 |
| 4617_recO-4613_recB_ruvABC_recG                  | 7.60E-10 |
| 4618_recO_ruvABC-4613_recB_ruvABC_recG           | 2.38E-10 |
| 4619_recO_recG-4613_recB_ruvABC_recG             | 2.28E-07 |
| 4620_recO_ruvABC_recG-4613_recB_ruvABC_recG      | 0.185035 |
| 4621_recB_recO-4613_recB_ruvABC_recG             | 1        |
| 4658_recB_recO_ruvABC-4613_recB_ruvABC_recG      | 0.999433 |
| 4659_recB_recO_recG-4613_recB_ruvABC_recG        | 0.728385 |
| 4660_recB_recO_ruvABC_recG-4613_recB_ruvABC_recG | 1        |
| TRM387_wt-4613_recB_ruvABC_recG                  | 6.36E-10 |
| 4618_recO_ruvABC-4617_recO                       | 1        |
| 4619_recO_recG-4617_recO                         | 0.64714  |
| 4620_recO_ruvABC_recG-4617_recO                  | 9.82E-13 |
| 4621_recB_recO-4617_recO                         | 2.99E-10 |
| 4658_recB_recO_ruvABC-4617_recO                  | 7.14E-11 |
| 4659_recB_recO_recG-4617_recO                    | 6.38E-12 |
| 4660_recB_recO_ruvABC_recG-4617_recO             | 1.05E-09 |
| TRM387_wt-4617_recO                              | 1        |
| 4619_recO_recG-4618_recO_ruvABC                  | 0.337233 |
| 4620_recO_ruvABC_recG-4618_recO_ruvABC           | 4.32E-13 |
| 4621_recB_recO-4618_recO_ruvABC                  | 9.61E-11 |
| 4658_recB_recO_ruvABC-4618_recO_ruvABC           | 2.38E-11 |
| 4659_recB_recO_recG-4618_recO_ruvABC             | 2.35E-12 |
| 4660_recB_recO_ruvABC_recG-4618_recO_ruvABC      | 3.27E-10 |
| TRM387_wt-4618_recO_ruvABC                       | 1        |
| 4620_recO_ruvABC_recG-4619_recO_recG             | 1.10E-10 |
| 4621_recB_recO-4619_recO_recG                    | 8.01E-08 |

|                                                  |          |
|--------------------------------------------------|----------|
| 4658_recB_recO_ruvABC-4619_recO_recG             | 1.60E-08 |
| 4659_recB_recO_recG-4619_recO_recG               | 1.03E-09 |
| 4660_recB_recO_ruvABC_recG-4619_recO_recG        | 3.27E-07 |
| TRM387_wt-4619_recO_recG                         | 0.597705 |
| 4621_recB_recO-4620_recO_ruvABC_recG             | 0.370016 |
| 4658_recB_recO_ruvABC-4620_recO_ruvABC_recG      | 0.765422 |
| 4659_recB_recO_recG-4620_recO_ruvABC_recG        | 0.999725 |
| 4660_recB_recO_ruvABC_recG-4620_recO_ruvABC_recG | 0.141082 |
| TRM387_wt-4620_recO_ruvABC_recG                  | 8.60E-13 |
| 4658_recB_recO_ruvABC-4621_recB_recO             | 0.999999 |
| 4659_recB_recO_recG-4621_recB_recO               | 0.918862 |
| 4660_recB_recO_ruvABC_recG-4621_recB_recO        | 1        |
| TRM387_wt-4621_recB_recO                         | 2.51E-10 |
| 4659_recB_recO_recG-4658_recB_recO_ruvABC        | 0.998556 |
| 4660_recB_recO_ruvABC_recG-4658_recB_recO_ruvABC | 0.99777  |
| TRM387_wt-4658_recB_recO_ruvABC                  | 6.03E-11 |
| 4660_recB_recO_ruvABC_recG-4659_recB_recO_recG   | 0.642063 |
| TRM387_wt-4659_recB_recO_recG                    | 5.46E-12 |
| TRM387_wt-4660_recB_recO_ruvABC_recG             | 8.79E-10 |

**Table S4.** Statistical analysis of differences in the occurrence of filamentous, anucleate and regular cells in different strains after 60 min of I-SceI expression (Table 2). P-values (p.adj.Chisq) are for the pairwise chi-square tests and are adjusted for multiple testing through the Bonferroni method. NA, not available.

| Comparison strain1-strain2           | p.adj.Chisq |
|--------------------------------------|-------------|
| TRM387_wt-4199_ruvABC                | 3.50E-177   |
| TRM387_wt-4201_recG                  | 1.12E-65    |
| TRM387_wt-4202_ruvABC_recG           | 8.03E-202   |
| TRM387_wt-4198_recB                  | 2.30E-49    |
| TRM387_wt-4611_recB_ruvABC           | 1.97E-26    |
| TRM387_wt-4612_recB_recG             | 2.00E-40    |
| TRM387_wt-4613_recB_ruvABC_recG      | 6.06E-34    |
| TRM387_wt-4617_recO                  | 1           |
| TRM387_wt-4618_recO_ruvABC           | 2.95E-127   |
| TRM387_wt-4619_recO_recG             | 1.74E-29    |
| TRM387_wt-4620_recO_ruvABC_recG      | 7.78E-119   |
| TRM387_wt-4621_recB_recO             | 1.54E-33    |
| TRM387_wt-4658_recB_recO_ruvABC      | 3.25E-27    |
| TRM387_wt-4659_recB_recO_recG        | 2.55E-31    |
| TRM387_wt-4660_recB_recO_ruvABC_recG | 1.43E-35    |
| 4199_ruvABC-4201_recG                | 1.87E-41    |

|                                             |           |
|---------------------------------------------|-----------|
| 4199_ruvABC-4202_ruvABC_recG                | 0.00377   |
| 4199_ruvABC-4198_recB                       | 0         |
| 4199_ruvABC-4611_recB_ruvABC                | 4.75E-284 |
| 4199_ruvABC-4612_recB_recG                  | 7.62E-307 |
| 4199_ruvABC-4613_recB_ruvABC_recG           | 1.76E-301 |
| 4199_ruvABC-4617_recO                       | 2.52E-205 |
| 4199_ruvABC-4618_recO_ruvABC                | 1.63E-07  |
| 4199_ruvABC-4619_recO_recG                  | 1.09E-71  |
| 4199_ruvABC-4620_recO_ruvABC_recG           | 1.06E-12  |
| 4199_ruvABC-4621_recB_recO                  | 0         |
| 4199_ruvABC-4658_recB_recO_ruvABC           | 1.99E-311 |
| 4199_ruvABC-4659_recB_recO_recG             | 0         |
| 4199_ruvABC-4660_recB_recO_ruvABC_recG      | 0         |
| 4201_recG-4202_ruvABC_recG                  | 1.03E-53  |
| 4201_recG-4198_recB                         | 3.07E-200 |
| 4201_recG-4611_recB_ruvABC                  | 1.99E-152 |
| 4201_recG-4612_recB_recG                    | 2.38E-175 |
| 4201_recG-4613_recB_ruvABC_recG             | 7.72E-168 |
| 4201_recG-4617_recO                         | 9.40E-81  |
| 4201_recG-4618_recO_ruvABC                  | 2.85E-23  |
| 4201_recG-4619_recO_recG                    | 7.04E-07  |
| 4201_recG-4620_recO_ruvABC_recG             | 5.71E-10  |
| 4201_recG-4621_recB_recO                    | 1.08E-182 |
| 4201_recG-4658_recB_recO_ruvABC             | 2.47E-165 |
| 4201_recG-4659_recB_recO_recG               | 9.25E-177 |
| 4201_recG-4660_recB_recO_ruvABC_recG        | 2.55E-199 |
| 4202_ruvABC_recG-4198_recB                  | 0         |
| 4202_ruvABC_recG-4611_recB_ruvABC           | 7.16E-313 |
| 4202_ruvABC_recG-4612_recB_recG             | 0         |
| 4202_ruvABC_recG-4613_recB_ruvABC_recG      | 0         |
| 4202_ruvABC_recG-4617_recO                  | 4.77E-230 |
| 4202_ruvABC_recG-4618_recO_ruvABC           | 1.37E-22  |
| 4202_ruvABC_recG-4619_recO_recG             | 1.01E-90  |
| 4202_ruvABC_recG-4620_recO_ruvABC_recG      | 5.94E-17  |
| 4202_ruvABC_recG-4621_recB_recO             | 0         |
| 4202_ruvABC_recG-4658_recB_recO_ruvABC      | 0         |
| 4202_ruvABC_recG-4659_recB_recO_recG        | 0         |
| 4202_ruvABC_recG-4660_recB_recO_ruvABC_recG | 0         |
| 4198_recB-4611_recB_ruvABC                  | 1.36E-05  |
| 4198_recB-4612_recB_recG                    | NA        |
| 4198_recB-4613_recB_ruvABC_recG             | NA        |
| 4198_recB-4617_recO                         | 1.00E-45  |
| 4198_recB-4618_recO_ruvABC                  | 8.39E-274 |

|                                                  |           |
|--------------------------------------------------|-----------|
| 4198_recB-4619_recO_recG                         | 3.44E-137 |
| 4198_recB-4620_recO_ruvABC_recG                  | 2.40E-273 |
| 4198_recB-4621_recB_recO                         | 1.02E-07  |
| 4198_recB-4658_recB_recO_ruvABC                  | 9.27E-12  |
| 4198_recB-4659_recB_recO_recG                    | 4.25E-14  |
| 4198_recB-4660_recB_recO_ruvABC_recG             | 3.18E-14  |
| 4611_recB_ruvABC-4612_recB_recG                  | 0.00367   |
| 4611_recB_ruvABC-4613_recB_ruvABC_recG           | 1         |
| 4611_recB_ruvABC-4617_recO                       | 2.63E-23  |
| 4611_recB_ruvABC-4618_recO_ruvABC                | 1.92E-223 |
| 4611_recB_ruvABC-4619_recO_recG                  | 1.44E-98  |
| 4611_recB_ruvABC-4620_recO_ruvABC_recG           | 4.41E-219 |
| 4611_recB_ruvABC-4621_recB_recO                  | 1         |
| 4611_recB_ruvABC-4658_recB_recO_ruvABC           | 1         |
| 4611_recB_ruvABC-4659_recB_recO_recG             | 0.456     |
| 4611_recB_ruvABC-4660_recB_recO_ruvABC_recG      | 1         |
| 4612_recB_recG-4613_recB_ruvABC_recG             | NA        |
| 4612_recB_recG-4617_recO                         | 3.45E-37  |
| 4612_recB_recG-4618_recO_ruvABC                  | 6.98E-244 |
| 4612_recB_recG-4619_recO_recG                    | 3.58E-118 |
| 4612_recB_recG-4620_recO_ruvABC_recG             | 2.05E-243 |
| 4612_recB_recG-4621_recB_recO                    | 0.000105  |
| 4612_recB_recG-4658_recB_recO_ruvABC             | 5.41E-08  |
| 4612_recB_recG-4659_recB_recO_recG               | 7.52E-10  |
| 4612_recB_recG-4660_recB_recO_ruvABC_recG        | 6.18E-10  |
| 4613_recB_ruvABC_recG-4617_recO                  | 1.22E-30  |
| 4613_recB_ruvABC_recG-4618_recO_ruvABC           | 5.49E-239 |
| 4613_recB_ruvABC_recG-4619_recO_recG             | 5.21E-111 |
| 4613_recB_ruvABC_recG-4620_recO_ruvABC_recG      | 2.26E-236 |
| 4613_recB_ruvABC_recG-4621_recB_recO             | 1         |
| 4613_recB_ruvABC_recG-4658_recB_recO_ruvABC      | 0.0073    |
| 4613_recB_ruvABC_recG-4659_recB_recO_recG        | 0.000508  |
| 4613_recB_ruvABC_recG-4660_recB_recO_ruvABC_recG | 0.000397  |
| 4617_recO-4618_recO_ruvABC                       | 6.54E-152 |
| 4617_recO-4619_recO_recG                         | 1.17E-38  |
| 4617_recO-4620_recO_ruvABC_recG                  | 6.74E-140 |
| 4617_recO-4621_recB_recO                         | 1.64E-29  |
| 4617_recO-4658_recB_recO_ruvABC                  | 1.66E-23  |
| 4617_recO-4659_recB_recO_recG                    | 4.32E-27  |
| 4617_recO-4660_recB_recO_ruvABC_recG             | 8.54E-31  |
| 4618_recO_ruvABC-4619_recO_recG                  | 5.86E-40  |
| 4618_recO_ruvABC-4620_recO_ruvABC_recG           | 5.91E-13  |
| 4618_recO_ruvABC-4621_recB_recO                  | 9.44E-268 |

|                                                  |           |
|--------------------------------------------------|-----------|
| 4618_recO_ruvABC-4658_recB_recO_ruvABC           | 7.61E-249 |
| 4618_recO_ruvABC-4659_recB_recO_recG             | 3.99E-268 |
| 4618_recO_ruvABC-4660_recB_recO_ruvABC_recG      | 1.16E-301 |
| 4619_recO_recG-4620_recO_ruvABC_recG             | 4.07E-34  |
| 4619_recO_recG-4621_recB_recO                    | 1.65E-120 |
| 4619_recO_recG-4658_recB_recO_ruvABC             | 2.48E-107 |
| 4619_recO_recG-4659_recB_recO_recG               | 1.61E-116 |
| 4619_recO_recG-4660_recB_recO_ruvABC_recG        | 1.04E-132 |
| 4620_recO_ruvABC_recG-4621_recB_recO             | 2.54E-258 |
| 4620_recO_ruvABC_recG-4658_recB_recO_ruvABC      | 6.59E-238 |
| 4620_recO_ruvABC_recG-4659_recB_recO_recG        | 5.62E-253 |
| 4620_recO_ruvABC_recG-4660_recB_recO_ruvABC_recG | 2.06E-282 |
| 4621_recB_recO-4658_recB_recO_ruvABC             | 1         |
| 4621_recB_recO-4659_recB_recO_recG               | 1         |
| 4621_recB_recO-4660_recB_recO_ruvABC_recG        | 1         |
| 4658_recB_recO_ruvABC-4659_recB_recO_recG        | 1         |
| 4658_recB_recO_ruvABC-4660_recB_recO_ruvABC_recG | 1         |
| 4659_recB_recO_recG-4660_recB_recO_ruvABC_recG   | 1         |

**Table S5.** *E. coli* strains divided into groups (Tukey HSD test,  $\alpha=0.05$ ) based on the data analysed on  $\gamma$ -survival at 200 Gy (see also Figure 4). Groups labeled with identical letters don't differ significantly in mean log survival rates. The group labels are ordered by the decreasing survival rates.

| Strain/genotype            | Group |
|----------------------------|-------|
| 2629_wt                    | a     |
| 3188_ruvABC                | ab    |
| 3196_recG                  | ab    |
| 3545_recO                  | bc    |
| 3600_recO_ruvABC           | cd    |
| 3601_recO_recG             | d     |
| 3183_recB                  | e     |
| 3625_recB_ruvABC           | e     |
| 3682_recB_recG             | f     |
| 4134_recB_ruvABC_recG      | f     |
| 3599_recB_recO             | g     |
| 3602_recB_recO_ruvABC      | g     |
| 3605_recB_recO_ruvABC_recG | g     |
| 3604_recO_ruvABC_recG      | g     |
| 3603_recB_recO_recG        | gh    |
| 3610_ruvABC_recG           | h     |

**Table S6.** Statistical analysis of differences in survival after 200 Gy of  $\gamma$ -irradiation (see also Figure 4) presented as pairwise p-values (p adj) from the Tukey HSD test, which controls for multiple testing.

| Comparison strain1-strain2             | p adj      |
|----------------------------------------|------------|
| 3183_recB-2629_wt                      | 1,1001E-12 |
| 3196_recG-2629_wt                      | 0,32165629 |
| 3545_recO-2629_wt                      | 0,00041617 |
| 3599_recB_recO-2629_wt                 | 1,1001E-12 |
| 3600_recO_ruvABC-2629_wt               | 5,0985E-08 |
| 3601_recO_recG-2629_wt                 | 2,4518E-12 |
| 3602_recB_recO_ruvABC-2629_wt          | 1,1001E-12 |
| 3603_recB_recO_recG-2629_wt            | 1,1001E-12 |
| 3604_recO_ruvABC_recG-2629_wt          | 1,1001E-12 |
| 3605_recB_recO_ruvABC_recG-2629_wt     | 1,1001E-12 |
| 3610_ruvABC_recG-2629_wt               | 1,1001E-12 |
| 3625_recB_ruvABC-2629_wt               | 1,1001E-12 |
| 3682_recB_recG-2629_wt                 | 1,1001E-12 |
| 4134_recB_ruvABC_recG-2629_wt          | 1,1001E-12 |
| 3188_ruvABC-3183_recB                  | 1,1001E-12 |
| 3196_recG-3183_recB                    | 1,1001E-12 |
| 3545_recO-3183_recB                    | 1,1001E-12 |
| 3599_recB_recO-3183_recB               | 1,4956E-11 |
| 3600_recO_ruvABC-3183_recB             | 1,1002E-12 |
| 3601_recO_recG-3183_recB               | 1,1263E-12 |
| 3602_recB_recO_ruvABC-3183_recB        | 8,4797E-12 |
| 3603_recB_recO_recG-3183_recB          | 1,103E-12  |
| 3604_recO_ruvABC_recG-3183_recB        | 1,2135E-12 |
| 3605_recB_recO_ruvABC_recG-3183_recB   | 1,5792E-12 |
| 3610_ruvABC_recG-3183_recB             | 1,1001E-12 |
| 3625_recB_ruvABC-3183_recB             | 1          |
| 3682_recB_recG-3183_recB               | 0,00119292 |
| 4134_recB_ruvABC_recG-3183_recB        | 3,5438E-06 |
| 3196_recG-3188_ruvABC                  | 1          |
| 3545_recO-3188_ruvABC                  | 0,49711558 |
| 3599_recB_recO-3188_ruvABC             | 1,1001E-12 |
| 3600_recO_ruvABC-3188_ruvABC           | 0,00114002 |
| 3601_recO_recG-3188_ruvABC             | 4,5958E-08 |
| 3602_recB_recO_ruvABC-3188_ruvABC      | 1,1001E-12 |
| 3603_recB_recO_recG-3188_ruvABC        | 1,1001E-12 |
| 3604_recO_ruvABC_recG-3188_ruvABC      | 1,1001E-12 |
| 3605_recB_recO_ruvABC_recG-3188_ruvABC | 1,1001E-12 |
| 3610_ruvABC_recG-3188_ruvABC           | 1,1001E-12 |
| 3625_recB_ruvABC-3188_ruvABC           | 1,1001E-12 |
| 3682_recB_recG-3188_ruvABC             | 1,1001E-12 |
| 4134_recB_ruvABC_recG-3188_ruvABC      | 1,1001E-12 |
| 3545_recO-3196_recG                    | 0,67156974 |
| 3599_recB_recO-3196_recG               | 1,1001E-12 |
| 3600_recO_ruvABC-3196_recG             | 0,00252715 |
| 3601_recO_recG-3196_recG               | 1,0619E-07 |
| 3602_recB_recO_ruvABC-3196_recG        | 1,1001E-12 |



|                                                  |            |
|--------------------------------------------------|------------|
| 3603_recB_recO_recG-3196_recG                    | 1,1001E-12 |
| 3604_recO_ruvABC_recG-3196_recG                  | 1,1001E-12 |
| 3605_recB_recO_ruvABC_recG-3196_recG             | 1,1001E-12 |
| 3610_ruvABC_recG-3196_recG                       | 1,1001E-12 |
| 3625_recB_ruvABC-3196_recG                       | 1,1001E-12 |
| 3682_recB_recG-3196_recG                         | 1,1001E-12 |
| 4134_recB_ruvABC_recG-3196_recG                  | 1,1001E-12 |
| 3599_recB_recO-3545_recO                         | 1,1001E-12 |
| 3600_recO_ruvABC-3545_recO                       | 0,51701111 |
| 3601_recO_recG-3545_recO                         | 0,00016229 |
| 3602_recB_recO_ruvABC-3545_recO                  | 1,1001E-12 |
| 3603_recB_recO_recG-3545_recO                    | 1,1001E-12 |
| 3604_recO_ruvABC_recG-3545_recO                  | 1,1001E-12 |
| 3605_recB_recO_ruvABC_recG-3545_recO             | 1,1001E-12 |
| 3610_ruvABC_recG-3545_recO                       | 1,1001E-12 |
| 3625_recB_ruvABC-3545_recO                       | 1,1001E-12 |
| 3682_recB_recG-3545_recO                         | 1,1001E-12 |
| 4134_recB_ruvABC_recG-3545_recO                  | 1,1001E-12 |
| 3600_recO_ruvABC-3599_recB_recO                  | 1,1001E-12 |
| 3601_recO_recG-3599_recB_recO                    | 1,1001E-12 |
| 3602_recB_recO_ruvABC-3599_recB_recO             | 1          |
| 3603_recB_recO_recG-3599_recB_recO               | 0,10921846 |
| 3604_recO_ruvABC_recG-3599_recB_recO             | 0,96116862 |
| 3605_recB_recO_ruvABC_recG-3599_recB_recO        | 0,99915218 |
| 3610_ruvABC_recG-3599_recB_recO                  | 3,2468E-05 |
| 3625_recB_ruvABC-3599_recB_recO                  | 1,3055E-09 |
| 3682_recB_recG-3599_recB_recO                    | 0,00065138 |
| 4134_recB_ruvABC_recG-3599_recB_recO             | 6,4711E-05 |
| 3601_recO_recG-3600_recO_ruvABC                  | 0,17238577 |
| 3602_recB_recO_ruvABC-3600_recO_ruvABC           | 1,1001E-12 |
| 3603_recB_recO_recG-3600_recO_ruvABC             | 1,1001E-12 |
| 3604_recO_ruvABC_recG-3600_recO_ruvABC           | 1,1001E-12 |
| 3605_recB_recO_ruvABC_recG-3600_recO_ruvABC      | 1,1001E-12 |
| 3610_ruvABC_recG-3600_recO_ruvABC                | 1,1001E-12 |
| 3625_recB_ruvABC-3600_recO_ruvABC                | 1,1008E-12 |
| 3682_recB_recG-3600_recO_ruvABC                  | 1,1001E-12 |
| 4134_recB_ruvABC_recG-3600_recO_ruvABC           | 1,1001E-12 |
| 3602_recB_recO_ruvABC-3601_recO_recG             | 1,1001E-12 |
| 3603_recB_recO_recG-3601_recO_recG               | 1,1001E-12 |
| 3604_recO_ruvABC_recG-3601_recO_recG             | 1,1001E-12 |
| 3605_recB_recO_ruvABC_recG-3601_recO_recG        | 1,1001E-12 |
| 3610_ruvABC_recG-3601_recO_recG                  | 1,1001E-12 |
| 3625_recB_ruvABC-3601_recO_recG                  | 1,3546E-12 |
| 3682_recB_recG-3601_recO_recG                    | 1,1005E-12 |
| 4134_recB_ruvABC_recG-3601_recO_recG             | 1,1001E-12 |
| 3603_recB_recO_recG-3602_recB_recO_ruvABC        | 0,16689445 |
| 3604_recO_ruvABC_recG-3602_recB_recO_ruvABC      | 0,9874719  |
| 3605_recB_recO_ruvABC_recG-3602_recB_recO_ruvABC | 0,99991888 |
| 3610_ruvABC_recG-3602_recB_recO_ruvABC           | 6,6079E-05 |
| 3625_recB_ruvABC-3602_recB_recO_ruvABC           | 7,1406E-10 |

|                                                  |            |
|--------------------------------------------------|------------|
| 3682_recB_recG-3602_recB_recO_ruvABC             | 0,00035136 |
| 4134_recB_ruvABC_recG-3602_recB_recO_ruvABC      | 3,0058E-05 |
| 3604_recO_ruvABC_recG-3603_recB_recO_recG        | 0,93043756 |
| 3605_recB_recO_ruvABC_recG-3603_recB_recO_recG   | 0,67093631 |
| 3610_ruvABC_recG-3603_recB_recO_recG             | 0,59003804 |
| 3625_recB_ruvABC-3603_recB_recO_recG             | 1,2055E-12 |
| 3682_recB_recG-3603_recB_recO_recG               | 1,3191E-08 |
| 4134_recB_ruvABC_recG-3603_recB_recO_recG        | 1,6719E-10 |
| 3605_recB_recO_ruvABC_recG-3604_recO_ruvABC_recG | 0,99999994 |
| 3610_ruvABC_recG-3604_recO_ruvABC_recG           | 0,00877785 |
| 3625_recB_ruvABC-3604_recO_ruvABC_recG           | 1,1628E-11 |
| 3682_recB_recG-3604_recO_ruvABC_recG             | 3,6069E-06 |
| 4134_recB_ruvABC_recG-3604_recO_ruvABC_recG      | 1,1636E-07 |
| 3610_ruvABC_recG-3605_recB_recO_ruvABC_recG      | 0,00155884 |
| 3625_recB_ruvABC-3605_recB_recO_ruvABC_recG      | 4,9202E-11 |
| 3682_recB_recG-3605_recB_recO_ruvABC_recG        | 1,9731E-05 |
| 4134_recB_ruvABC_recG-3605_recB_recO_ruvABC_recG | 8,9137E-07 |
| 3625_recB_ruvABC-3610_ruvABC_recG                | 1,1005E-12 |
| 3682_recB_recG-3610_ruvABC_recG                  | 1,7021E-12 |
| 4134_recB_ruvABC_recG-3610_ruvABC_recG           | 1,1026E-12 |
| 3682_recB_recG-3625_recB_ruvABC                  | 0,01694308 |
| 4134_recB_ruvABC_recG-3625_recB_ruvABC           | 0,00049422 |
| 4134_recB_ruvABC_recG-3682_recB_recG             | 1          |

**Table S7.** Statistical analysis of differences in the occurrence of filamentous, anucleate and regular cells in different strains after UV-dose of 5 J/m<sup>2</sup> (Table 3). P-values (p.adj.Chisq) are for the pairwise chi-square tests and are adjusted for multiple testing through the Bonferroni method.

| Comparison strain1:strain2           | p.adj.Chisq |
|--------------------------------------|-------------|
| 2629_wt : 3188_ruvABC                | 0           |
| 2629_wt : 3196_recG                  | 9,86E-136   |
| 2629_wt : 3610_ruvABC_recG           | 0           |
| 2629_wt : 3182_recB                  | 2,84E-14    |
| 2629_wt : 3625_recB_ruvABC           | 1,38E-206   |
| 2629_wt : 3626_recB_recG             | 7,12E-16    |
| 2629_wt : 4134_recB_ruvABC_recG      | 1,86E-65    |
| 2629_wt : 3545_recO                  | 8,16E-304   |
| 2629_wt : 3600_recO_ruvABC           | 0           |
| 2629_wt : 3601_recO_recG             | 0           |
| 2629_wt : 3604_recO_ruvABC_recG      | 0           |
| 2629_wt : 3599_recB_recO             | 3,88E-45    |
| 2629_wt : 3602_recB_recO_ruvABC      | 1,39E-44    |
| 2629_wt : 3603_recB_recO_recG        | 1,54E-35    |
| 2629_wt : 3605_recB_recO_ruvABC_recG | 7,8E-33     |
| 3188_ruvABC : 3196_recG              | 4,21E-194   |
| 3188_ruvABC : 3610_ruvABC_recG       | 4,9E-15     |
| 3188_ruvABC : 3182_recB              | 0           |
| 3188_ruvABC : 3625_recB_ruvABC       | 1,51E-83    |
| 3188_ruvABC : 3626_recB_recG         | 0           |

|                                               |                       |
|-----------------------------------------------|-----------------------|
| 3188_ruvABC : 4134_recB_ruvABC_recG           | 0                     |
| 3188_ruvABC : 3545_recO                       | 1,96E-163             |
| 3188_ruvABC : 3600_recO_ruvABC                | 1,17E-86              |
| 3188_ruvABC : 3601_recO_recG                  | 7,34E-146             |
| 3188_ruvABC : 3604_recO_ruvABC_recG           | 1,79E-20              |
| 3188_ruvABC : 3599_recB_recO                  | 3.07000000023002e-314 |
| 3188_ruvABC : 3602_recB_recO_ruvABC           | 0                     |
| 3188_ruvABC : 3603_recB_recO_recG             | 0                     |
| 3188_ruvABC : 3605_recB_recO_ruvABC_recG      | 0                     |
| 3196_recG : 3610_ruvABC_recG                  | 1,94E-232             |
| 3196_recG : 3182_recB                         | 1,16E-182             |
| 3196_recG : 3625_recB_ruvABC                  | 1,3E-32               |
| 3196_recG : 3626_recB_recG                    | 2,7E-114              |
| 3196_recG : 4134_recB_ruvABC_recG             | 1,57E-34              |
| 3196_recG : 3545_recO                         | 2,48E-59              |
| 3196_recG : 3600_recO_ruvABC                  | 4,58E-104             |
| 3196_recG : 3601_recO_recG                    | 2,62E-86              |
| 3196_recG : 3604_recO_ruvABC_recG             | 1,43E-115             |
| 3196_recG : 3599_recB_recO                    | 2,9E-51               |
| 3196_recG : 3602_recB_recO_ruvABC             | 6,53E-55              |
| 3196_recG : 3603_recB_recO_recG               | 1,08E-78              |
| 3196_recG : 3605_recB_recO_ruvABC_recG        | 7,32E-98              |
| 3610_ruvABC_recG : 3182_recB                  | 0                     |
| 3610_ruvABC_recG : 3625_recB_ruvABC           | 4,58E-127             |
| 3610_ruvABC_recG : 3626_recB_recG             | 0                     |
| 3610_ruvABC_recG : 4134_recB_ruvABC_recG      | 0                     |
| 3610_ruvABC_recG : 3545_recO                  | 3,4E-140              |
| 3610_ruvABC_recG : 3600_recO_ruvABC           | 5,87E-56              |
| 3610_ruvABC_recG : 3601_recO_recG             | 4,25E-113             |
| 3610_ruvABC_recG : 3604_recO_ruvABC_recG      | 7,04E-10              |
| 3610_ruvABC_recG : 3599_recB_recO             | 0                     |
| 3610_ruvABC_recG : 3602_recB_recO_ruvABC      | 0                     |
| 3610_ruvABC_recG : 3603_recB_recO_recG        | 0                     |
| 3610_ruvABC_recG : 3605_recB_recO_ruvABC_recG | 0                     |
| 3182_recB : 3625_recB_ruvABC                  | 3.19000000963269e-316 |
| 3182_recB : 3626_recB_recG                    | 1                     |
| 3182_recB : 4134_recB_ruvABC_recG             | 3,05E-95              |
| 3182_recB : 3545_recO                         | 0                     |
| 3182_recB : 3600_recO_ruvABC                  | 0                     |
| 3182_recB : 3601_recO_recG                    | 0                     |
| 3182_recB : 3604_recO_ruvABC_recG             | 0                     |
| 3182_recB : 3599_recB_recO                    | 8,69E-25              |
| 3182_recB : 3602_recB_recO_ruvABC             | 5,5E-30               |
| 3182_recB : 3603_recB_recO_recG               | 1,2E-16               |
| 3182_recB : 3605_recB_recO_ruvABC_recG        | 2,62E-13              |
| 3625_recB_ruvABC : 3626_recB_recG             | 4,46E-206             |
| 3625_recB_ruvABC : 4134_recB_ruvABC_recG      | 2,39E-93              |
| 3625_recB_ruvABC : 3545_recO                  | 1,94E-74              |
| 3625_recB_ruvABC : 3600_recO_ruvABC           | 8,82E-78              |
| 3625_recB_ruvABC : 3601_recO_recG             | 4,98E-95              |

|                                                    |                       |
|----------------------------------------------------|-----------------------|
| 3625_recB_ruvABC : 3604_recO_ruvABC_recG           | 2,5E-53               |
| 3625_recB_ruvABC : 3599_recB_recO                  | 1,31E-120             |
| 3625_recB_ruvABC : 3602_recB_recO_ruvABC           | 6,49E-134             |
| 3625_recB_ruvABC : 3603_recB_recO_recG             | 5,2E-170              |
| 3625_recB_ruvABC : 3605_recB_recO_ruvABC_recG      | 7,46E-204             |
| 3626_recB_recG : 4134_recB_ruvABC_recG             | 2,54E-56              |
| 3626_recB_recG : 3545_recO                         | 1,5E-278              |
| 3626_recB_recG : 3600_recO_ruvABC                  | 0                     |
| 3626_recB_recG : 3601_recO_recG                    | 9.47999999999849e-312 |
| 3626_recB_recG : 3604_recO_ruvABC_recG             | 0                     |
| 3626_recB_recG : 3599_recB_recO                    | 2,3E-12               |
| 3626_recB_recG : 3602_recB_recO_ruvABC             | 4,25E-15              |
| 3626_recB_recG : 3603_recB_recO_recG               | 9,94E-07              |
| 3626_recB_recG : 3605_recB_recO_ruvABC_recG        | 0,000136              |
| 4134_recB_ruvABC_recG : 3545_recO                  | 1,24E-209             |
| 4134_recB_ruvABC_recG : 3600_recO_ruvABC           | 1,01E-269             |
| 4134_recB_ruvABC_recG : 3601_recO_recG             | 2,56E-248             |
| 4134_recB_ruvABC_recG : 3604_recO_ruvABC_recG      | 1,03E-251             |
| 4134_recB_ruvABC_recG : 3599_recB_recO             | 4,5E-40               |
| 4134_recB_ruvABC_recG : 3602_recB_recO_ruvABC      | 1,16E-40              |
| 4134_recB_ruvABC_recG : 3603_recB_recO_recG        | 1,46E-49              |
| 4134_recB_ruvABC_recG : 3605_recB_recO_ruvABC_recG | 2,42E-59              |
| 3545_recO : 3600_recO_ruvABC                       | 6,65E-19              |
| 3545_recO : 3601_recO_recG                         | 0,00211               |
| 3545_recO : 3604_recO_ruvABC_recG                  | 2,53E-65              |
| 3545_recO : 3599_recB_recO                         | 5,35E-147             |
| 3545_recO : 3602_recB_recO_ruvABC                  | 2,11E-160             |
| 3545_recO : 3603_recB_recO_recG                    | 1,33E-206             |
| 3545_recO : 3605_recB_recO_ruvABC_recG             | 5,95E-243             |
| 3600_recO_ruvABC : 3601_recO_recG                  | 3,91E-10              |
| 3600_recO_ruvABC : 3604_recO_ruvABC_recG           | 2,1E-19               |
| 3600_recO_ruvABC : 3599_recB_recO                  | 1,08E-218             |
| 3600_recO_ruvABC : 3602_recB_recO_ruvABC           | 2,72E-236             |
| 3600_recO_ruvABC : 3603_recB_recO_recG             | 6,74E-289             |
| 3600_recO_ruvABC : 3605_recB_recO_ruvABC_recG      | 0                     |
| 3601_recO_recG : 3604_recO_ruvABC_recG             | 2,4E-55               |
| 3601_recO_recG : 3599_recB_recO                    | 4,34E-175             |
| 3601_recO_recG : 3602_recB_recO_ruvABC             | 4,2E-189              |
| 3601_recO_recG : 3603_recB_recO_recG               | 4,39E-237             |
| 3601_recO_recG : 3605_recB_recO_ruvABC_recG        | 6,07E-275             |
| 3604_recO_ruvABC_recG : 3599_recB_recO             | 4,94E-235             |
| 3604_recO_ruvABC_recG : 3602_recB_recO_ruvABC      | 2,78E-255             |
| 3604_recO_ruvABC_recG : 3603_recB_recO_recG        | 1,16E-307             |
| 3604_recO_ruvABC_recG : 3605_recB_recO_ruvABC_recG | 0                     |
| 3599_recB_recO : 3602_recB_recO_ruvABC             | 1                     |
| 3599_recB_recO : 3603_recB_recO_recG               | 1                     |
| 3599_recB_recO : 3605_recB_recO_ruvABC_recG        | 0,403                 |
| 3602_recB_recO_ruvABC : 3603_recB_recO_recG        | 0,569                 |
| 3602_recB_recO_ruvABC : 3605_recB_recO_ruvABC_recG | 0,00454               |
| 3603_recB_recO_recG : 3605_recB_recO_ruvABC_recG   | 1                     |

**Table S8.** Statistical analysis of differences in the occurrence of filamentous, anucleate and regular cells in different strains after  $\gamma$ -dose of 100 Gy (Table 3). P-values (p.adj.Chisq) are for the pairwise chi-square tests and are adjusted for multiple testing through the Bonferroni method.

| <b>Comparison strain1:strain2</b>        | <b>p.adj.Chisq</b> |
|------------------------------------------|--------------------|
| 2629_wt : 3188_ruvABC                    | 1,63E-252          |
| 2629_wt : 3196_recG                      | 5,41E-44           |
| 2629_wt : 3610_ruvABC_recG               | 0                  |
| 2629_wt : 3182_recB                      | 0,00000092         |
| 2629_wt : 3625_recB_ruvABC               | 1,86E-29           |
| 2629_wt : 3626_recB_recG                 | 7,42E-07           |
| 2629_wt : 4134_recB_ruvABC_recG          | 0,0000844          |
| 2629_wt : 3545_recO                      | 5,99E-15           |
| 2629_wt : 3600_recO_ruvABC               | 6,91E-280          |
| 2629_wt : 3601_recO_recG                 | 3,18E-56           |
| 2629_wt : 3604_recO_ruvABC_recG          | 5,73E-285          |
| 2629_wt : 3599_recB_recO                 | 1,25E-19           |
| 2629_wt : 3602_recB_recO_ruvABC          | 9,91E-20           |
| 2629_wt : 3603_recB_recO_recG            | 2,88E-21           |
| 2629_wt : 3605_recB_recO_ruvABC_recG     | 1,8E-19            |
| 3188_ruvABC : 3196_recG                  | 1,72E-162          |
| 3188_ruvABC : 3610_ruvABC_recG           | 1,87E-54           |
| 3188_ruvABC : 3182_recB                  | 7,8E-292           |
| 3188_ruvABC : 3625_recB_ruvABC           | 7,14E-127          |
| 3188_ruvABC : 3626_recB_recG             | 0                  |
| 3188_ruvABC : 4134_recB_ruvABC_recG      | 3,38E-259          |
| 3188_ruvABC : 3545_recO                  | 5,63E-168          |
| 3188_ruvABC : 3600_recO_ruvABC           | 0,376              |
| 3188_ruvABC : 3601_recO_recG             | 6,52E-100          |
| 3188_ruvABC : 3604_recO_ruvABC_recG      | 2,25E-14           |
| 3188_ruvABC : 3599_recB_recO             | 6,27E-205          |
| 3188_ruvABC : 3602_recB_recO_ruvABC      | 1,6E-239           |
| 3188_ruvABC : 3603_recB_recO_recG        | 1,37E-230          |
| 3188_ruvABC : 3605_recB_recO_ruvABC_recG | 5,83E-300          |
| 3196_recG : 3610_ruvABC_recG             | 1,58E-250          |
| 3196_recG : 3182_recB                    | 1,54E-65           |
| 3196_recG : 3625_recB_ruvABC             | 9,28E-15           |
| 3196_recG : 3626_recB_recG               | 3,17E-78           |
| 3196_recG : 4134_recB_ruvABC_recG        | 3,26E-37           |
| 3196_recG : 3545_recO                    | 4,22E-25           |
| 3196_recG : 3600_recO_ruvABC             | 9,99E-180          |
| 3196_recG : 3601_recO_recG               | 1,63E-15           |
| 3196_recG : 3604_recO_ruvABC_recG        | 1,72E-161          |
| 3196_recG : 3599_recB_recO               | 5,09E-14           |
| 3196_recG : 3602_recB_recO_ruvABC        | 2,38E-19           |
| 3196_recG : 3603_recB_recO_recG          | 3,62E-17           |
| 3196_recG : 3605_recB_recO_ruvABC_recG   | 1,79E-25           |
| 3610_ruvABC_recG : 3182_recB             | 0                  |
| 3610_ruvABC_recG : 3625_recB_ruvABC      | 1,47E-239          |
| 3610_ruvABC_recG : 3626_recB_recG        | 0                  |

|                                                    |                       |
|----------------------------------------------------|-----------------------|
| 3610_ruvABC_recG : 4134_recB_ruvABC_recG           | 0                     |
| 3610_ruvABC_recG : 3545_recO                       | 5,96E-297             |
| 3610_ruvABC_recG : 3600_recO_ruvABC                | 1,31E-35              |
| 3610_ruvABC_recG : 3601_recO_recG                  | 1,54E-195             |
| 3610_ruvABC_recG : 3604_recO_ruvABC_recG           | 2,13E-19              |
| 3610_ruvABC_recG : 3599_recB_recO                  | 1.2400010172759e-318  |
| 3610_ruvABC_recG : 3602_recB_recO_ruvABC           | 0                     |
| 3610_ruvABC_recG : 3603_recB_recO_recG             | 0                     |
| 3610_ruvABC_recG : 3605_recB_recO_ruvABC_recG      | 0                     |
| 3182_recB : 3625_recB_ruvABC                       | 1,42E-54              |
| 3182_recB : 3626_recB_recG                         | 1                     |
| 3182_recB : 4134_recB_ruvABC_recG                  | 0,000301              |
| 3182_recB : 3545_recO                              | 6,83E-36              |
| 3182_recB : 3600_recO_ruvABC                       | 1.20996676666521e-320 |
| 3182_recB : 3601_recO_recG                         | 8,85E-86              |
| 3182_recB : 3604_recO_ruvABC_recG                  | 0                     |
| 3182_recB : 3599_recB_recO                         | 1,04E-21              |
| 3182_recB : 3602_recB_recO_ruvABC                  | NA                    |
| 3182_recB : 3603_recB_recO_recG                    | NA                    |
| 3182_recB : 3605_recB_recO_ruvABC_recG             | 1,63E-18              |
| 3625_recB_ruvABC : 3626_recB_recG                  | 2,64E-64              |
| 3625_recB_ruvABC : 4134_recB_ruvABC_recG           | 8,89E-36              |
| 3625_recB_ruvABC : 3545_recO                       | 0,0365                |
| 3625_recB_ruvABC : 3600_recO_ruvABC                | 2,5E-147              |
| 3625_recB_ruvABC : 3601_recO_recG                  | 0,00701               |
| 3625_recB_ruvABC : 3604_recO_ruvABC_recG           | 1,98E-144             |
| 3625_recB_ruvABC : 3599_recB_recO                  | 3,52E-25              |
| 3625_recB_ruvABC : 3602_recB_recO_ruvABC           | 1,45E-31              |
| 3625_recB_ruvABC : 3603_recB_recO_recG             | 3,71E-30              |
| 3625_recB_ruvABC : 3605_recB_recO_ruvABC_recG      | 3,16E-41              |
| 3626_recB_recG : 4134_recB_ruvABC_recG             | 0,00000364            |
| 3626_recB_recG : 3545_recO                         | 3,66E-42              |
| 3626_recB_recG : 3600_recO_ruvABC                  | 0                     |
| 3626_recB_recG : 3601_recO_recG                    | 7,79E-101             |
| 3626_recB_recG : 3604_recO_ruvABC_recG             | 0                     |
| 3626_recB_recG : 3599_recB_recO                    | 4,26E-29              |
| 3626_recB_recG : 3602_recB_recO_ruvABC             | 1,72E-27              |
| 3626_recB_recG : 3603_recB_recO_recG               | 4,63E-30              |
| 3626_recB_recG : 3605_recB_recO_ruvABC_recG        | 1,5E-25               |
| 4134_recB_ruvABC_recG : 3545_recO                  | 9,09E-24              |
| 4134_recB_ruvABC_recG : 3600_recO_ruvABC           | 1,19E-285             |
| 4134_recB_ruvABC_recG : 3601_recO_recG             | 5,91E-60              |
| 4134_recB_ruvABC_recG : 3604_recO_ruvABC_recG      | 1,52E-285             |
| 4134_recB_ruvABC_recG : 3599_recB_recO             | 9,45E-07              |
| 4134_recB_ruvABC_recG : 3602_recB_recO_ruvABC      | 0,00000454            |
| 4134_recB_ruvABC_recG : 3603_recB_recO_recG        | 2,47E-07              |
| 4134_recB_ruvABC_recG : 3605_recB_recO_ruvABC_recG | 0,000199              |
| 3545_recO : 3600_recO_ruvABC                       | 1,17E-191             |
| 3545_recO : 3601_recO_recG                         | 1,21E-14              |
| 3545_recO : 3604_recO_ruvABC_recG                  | 2,59E-192             |

|                                                    |           |
|----------------------------------------------------|-----------|
| 3545_recO : 3599_recB_recO                         | 1,64E-23  |
| 3545_recO : 3602_recB_recO_ruvABC                  | 8,25E-28  |
| 3545_recO : 3603_recB_recO_recG                    | 1,51E-27  |
| 3545_recO : 3605_recB_recO_ruvABC_recG             | 1,46E-34  |
| 3600_recO_ruvABC : 3601_recO_recG                  | 3,58E-117 |
| 3600_recO_ruvABC : 3604_recO_ruvABC_recG           | 2,14E-07  |
| 3600_recO_ruvABC : 3599_recB_recO                  | 6,87E-227 |
| 3600_recO_ruvABC : 3602_recB_recO_ruvABC           | 4,73E-263 |
| 3600_recO_ruvABC : 3603_recB_recO_recG             | 1,59E-253 |
| 3600_recO_ruvABC : 3605_recB_recO_ruvABC_recG      | 0         |
| 3601_recO_recG : 3604_recO_ruvABC_recG             | 7,11E-109 |
| 3601_recO_recG : 3599_recB_recO                    | 2,28E-37  |
| 3601_recO_recG : 3602_recB_recO_ruvABC             | 4,79E-47  |
| 3601_recO_recG : 3603_recB_recO_recG               | 3,09E-44  |
| 3601_recO_recG : 3605_recB_recO_ruvABC_recG        | 5,67E-62  |
| 3604_recO_ruvABC_recG : 3599_recB_recO             | 6,2E-219  |
| 3604_recO_ruvABC_recG : 3602_recB_recO_ruvABC      | 1,77E-252 |
| 3604_recO_ruvABC_recG : 3603_recB_recO_recG        | 9,95E-243 |
| 3604_recO_ruvABC_recG : 3605_recB_recO_ruvABC_recG | 2.09e-309 |
| 3599_recB_recO : 3602_recB_recO_ruvABC             | 1         |
| 3599_recB_recO : 3603_recB_recO_recG               | 1         |
| 3599_recB_recO : 3605_recB_recO_ruvABC_recG        | 1         |
| 3602_recB_recO_ruvABC : 3603_recB_recO_recG        | NA        |
| 3602_recB_recO_ruvABC : 3605_recB_recO_ruvABC_recG | 1         |
| 3603_recB_recO_recG : 3605_recB_recO_ruvABC_recG   | 1         |

**Table S9.** *E. coli* strains divided into groups (Tukey HSD test,  $\alpha=0.05$ ) based on the data on UV-survival at 50 J/m<sup>2</sup> (see also Figure 9). Groups labeled with identical letters don't differ significantly in mean log survival rates. The group labels are ordered by the decreasing survival rates

| Strain/genotype            | Group |
|----------------------------|-------|
| 2629_wt                    | a     |
| 3196_recG                  | b     |
| 3545_recO                  | bc    |
| 3625_recB_ruvABC           | bcd   |
| 3188_ruvABC                | bcd   |
| 3601_recO_recG             | cd    |
| 3183_recB                  | de    |
| 3600_recO_ruvABC           | e     |
| 3626_recB_recG             | f     |
| 4134_recB_ruvABC_recG      | g     |
| 3602_recB_recO_ruvABC      | g     |
| 3599_recB_recO             | g     |
| 3605_recB_recO_ruvABC_recG | g     |
| 3603_recB_recO_recG        | gh    |
| 3610_ruvABC_recG           | hi    |
| 3604_recO_ruvABC_recG      | i     |

**Table S10.** Statistical analysis of differences in survival after 50 J/m<sup>2</sup> of UV (see also Figure 9) presented as pairwise p-values (p adj) from the Tukey HSD test, which controls for multiple testing.

| <b>Comparison strain1-strain2</b>      | <b>p adj</b> |
|----------------------------------------|--------------|
| 3183_recB-2629_wt                      | 1,8079E-12   |
| 3188_ruvABC-2629_wt                    | 2,0665E-08   |
| 3196_recG-2629_wt                      | 5,4367E-06   |
| 3545_recO-2629_wt                      | 4,4094E-07   |
| 3599__recB_recO-2629_wt                | 0            |
| 3600_recO_ruvABC-2629_wt               | 0            |
| 3601_recO_recG-2629_wt                 | 9,0727E-11   |
| 3602_recB_recO_ruvABC-2629_wt          | 0            |
| 3603_recB_recO_recG-2629_wt            | 0            |
| 3604_recO_ruvABC_recG-2629_wt          | 0            |
| 3605_recB_recO_ruvABC_recG-2629_wt     | 0            |
| 3610_ruvABC_recG-2629_wt               | 0            |
| 3625_recB_ruvABC-2629_wt               | 4,3616E-10   |
| 3626_recB_recG-2629_wt                 | 0            |
| 4134_recB_ruvABC_recG-2629_wt          | 0            |
| 3188_ruvABC-3183_recB                  | 0,69726016   |
| 3196_recG-3183_recB                    | 0,00027346   |
| 3545_recO-3183_recB                    | 0,03584529   |
| 3599__recB_recO-3183_recB              | 0            |
| 3600_recO_ruvABC-3183_recB             | 0,24161365   |
| 3601_recO_recG-3183_recB               | 0,99995333   |
| 3602_recB_recO_ruvABC-3183_recB        | 7,415E-12    |
| 3603_recB_recO_recG-3183_recB          | 0            |
| 3604_recO_ruvABC_recG-3183_recB        | 0            |
| 3605_recB_recO_ruvABC_recG-3183_recB   | 0            |
| 3610_ruvABC_recG-3183_recB             | 0            |
| 3625_recB_ruvABC-3183_recB             | 0,33564124   |
| 3626_recB_recG-3183_recB               | 1,6997E-06   |
| 4134_recB_ruvABC_recG-3183_recB        | 1,1737E-10   |
| 3196_recG-3188_ruvABC                  | 0,30219522   |
| 3545_recO-3188_ruvABC                  | 0,98777929   |
| 3599__recB_recO-3188_ruvABC            | 0            |
| 3600_recO_ruvABC-3188_ruvABC           | 0,00034155   |
| 3601_recO_recG-3188_ruvABC             | 0,99171242   |
| 3602_recB_recO_ruvABC-3188_ruvABC      | 0            |
| 3603_recB_recO_recG-3188_ruvABC        | 0            |
| 3604_recO_ruvABC_recG-3188_ruvABC      | 0            |
| 3605_recB_recO_ruvABC_recG-3188_ruvABC | 0            |
| 3610_ruvABC_recG-3188_ruvABC           | 0            |
| 3625_recB_ruvABC-3188_ruvABC           | 1            |
| 3626_recB_recG-3188_ruvABC             | 4,0045E-10   |
| 4134_recB_ruvABC_recG-3188_ruvABC      | 0            |
| 3545_recO-3196_recG                    | 0,98638171   |
| 3599__recB_recO-3196_recG              | 0            |
| 3600_recO_ruvABC-3196_recG             | 3,6165E-10   |
| 3601_recO_recG-3196_recG               | 0,00625197   |



|                                                  |            |
|--------------------------------------------------|------------|
| 3602_recB_recO_ruvABC-3196_recG                  | 0          |
| 3603_recB_recO_recG-3196_recG                    | 0          |
| 3604_recO_ruvABC_recG-3196_recG                  | 0          |
| 3605_recB_recO_ruvABC_recG-3196_recG             | 0          |
| 3610_ruvABC_recG-3196_recG                       | 0          |
| 3625_recB_ruvABC-3196_recG                       | 0,24265865 |
| 3626_recB_recG-3196_recG                         | 0          |
| 4134_recB_ruvABC_recG-3196_recG                  | 0          |
| 3599__recB_recO-3545_recO                        | 0          |
| 3600_recO_ruvABC-3545_recO                       | 4,5736E-07 |
| 3601_recO_recG-3545_recO                         | 0,28538958 |
| 3602_recB_recO_ruvABC-3545_recO                  | 0          |
| 3603_recB_recO_recG-3545_recO                    | 0          |
| 3604_recO_ruvABC_recG-3545_recO                  | 0          |
| 3605_recB_recO_ruvABC_recG-3545_recO             | 0          |
| 3610_ruvABC_recG-3545_recO                       | 0          |
| 3625_recB_ruvABC-3545_recO                       | 0,99504396 |
| 3626_recB_recG-3545_recO                         | 0          |
| 4134_recB_ruvABC_recG-3545_recO                  | 0          |
| 3600_recO_ruvABC-3599__recB_recO                 | 1,9866E-10 |
| 3601_recO_recG-3599__recB_recO                   | 0          |
| 3602_recB_recO_ruvABC-3599__recB_recO            | 0,99045409 |
| 3603_recB_recO_recG-3599__recB_recO              | 0,89271856 |
| 3604_recO_ruvABC_recG-3599__recB_recO            | 7,0965E-05 |
| 3605_recB_recO_ruvABC_recG-3599__recB_recO       | 0,99871845 |
| 3610_ruvABC_recG-3599__recB_recO                 | 0,00284946 |
| 3625_recB_ruvABC-3599__recB_recO                 | 0          |
| 3626_recB_recG-3599__recB_recO                   | 4,0627E-05 |
| 4134_recB_ruvABC_recG-3599__recB_recO            | 0,98806236 |
| 3601_recO_recG-3600_recO_ruvABC                  | 0,02818402 |
| 3602_recB_recO_ruvABC-3600_recO_ruvABC           | 1,9294E-08 |
| 3603_recB_recO_recG-3600_recO_ruvABC             | 3,6675E-12 |
| 3604_recO_ruvABC_recG-3600_recO_ruvABC           | 0          |
| 3605_recB_recO_ruvABC_recG-3600_recO_ruvABC      | 4,9474E-11 |
| 3610_ruvABC_recG-3600_recO_ruvABC                | 0          |
| 3625_recB_ruvABC-3600_recO_ruvABC                | 9,7852E-06 |
| 3626_recB_recG-3600_recO_ruvABC                  | 0,01335123 |
| 4134_recB_ruvABC_recG-3600_recO_ruvABC           | 2,4178E-07 |
| 3602_recB_recO_ruvABC-3601_recO_recG             | 0          |
| 3603_recB_recO_recG-3601_recO_recG               | 0          |
| 3604_recO_ruvABC_recG-3601_recO_recG             | 0          |
| 3605_recB_recO_ruvABC_recG-3601_recO_recG        | 0          |
| 3610_ruvABC_recG-3601_recO_recG                  | 0          |
| 3625_recB_ruvABC-3601_recO_recG                  | 0,90643227 |
| 3626_recB_recG-3601_recO_recG                    | 6,4028E-08 |
| 4134_recB_ruvABC_recG-3601_recO_recG             | 6,0801E-12 |
| 3603_recB_recO_recG-3602_recB_recO_ruvABC        | 0,1722987  |
| 3604_recO_ruvABC_recG-3602_recB_recO_ruvABC      | 9,2279E-07 |
| 3605_recB_recO_ruvABC_recG-3602_recB_recO_ruvABC | 0,56713899 |
| 3610_ruvABC_recG-3602_recB_recO_ruvABC           | 7,4233E-05 |

|                                                  |            |
|--------------------------------------------------|------------|
| 3625_recB_ruvABC-3602_recB_recO_ruvABC           | 0          |
| 3626_recB_recG-3602_recB_recO_ruvABC             | 0,00448488 |
| 4134_recB_ruvABC_recG-3602_recB_recO_ruvABC      | 1          |
| 3604_recO_ruvABC_recG-3603_recB_recO_recG        | 0,04529139 |
| 3605_recB_recO_ruvABC_recG-3603_recB_recO_recG   | 0,99999822 |
| 3610_ruvABC_recG-3603_recB_recO_recG             | 0,28138471 |
| 3625_recB_ruvABC-3603_recB_recO_recG             | 0          |
| 3626_recB_recG-3603_recB_recO_recG               | 2,8975E-07 |
| 4134_recB_ruvABC_recG-3603_recB_recO_recG        | 0,20109602 |
| 3605_recB_recO_ruvABC_recG-3604_recO_ruvABC_recG | 0,00702183 |
| 3610_ruvABC_recG-3604_recO_ruvABC_recG           | 1          |
| 3625_recB_ruvABC-3604_recO_ruvABC_recG           | 0          |
| 3626_recB_recG-3604_recO_ruvABC_recG             | 0          |
| 4134_recB_ruvABC_recG-3604_recO_ruvABC_recG      | 2,8617E-06 |
| 3610_ruvABC_recG-3605_recB_recO_ruvABC_recG      | 0,07894857 |
| 3625_recB_ruvABC-3605_recB_recO_ruvABC_recG      | 0          |
| 3626_recB_recG-3605_recB_recO_ruvABC_recG        | 3,7393E-06 |
| 4134_recB_ruvABC_recG-3605_recB_recO_ruvABC_recG | 0,58713941 |
| 3625_recB_ruvABC-3610_ruvABC_recG                | 0          |
| 3626_recB_recG-3610_ruvABC_recG                  | 1,8721E-10 |
| 4134_recB_ruvABC_recG-3610_ruvABC_recG           | 0,0001372  |
| 3626_recB_recG-3625_recB_ruvABC                  | 0          |
| 4134_recB_ruvABC_recG-3625_recB_ruvABC           | 0          |
| 4134_recB_ruvABC_recG-3626_recB_recG             | 0,01974773 |
